# Supplementary material for: Genomic and Metabolomic Landscape of Right-Sided and Left-Sided Colorectal Cancer: Potential Preventive Biomarkers
Source: MDPI journal article supplement (doi:10.3390/cells11030527), 2022-02-03
Supplement: s1 [file s1]

## Supplementary Material

**Supplementary Table S1.** The clinicohistopathological data for the 467 CRC patients used for PRS analysis.

| n = 467                    |             |
|----------------------------|-------------|
| Age, Mean (SD)             | 64.1 (11.7) |
| Gender, Male (%)           | 272 (58.2%) |
| BMI, Mean (SD)             | 24.4 (4.2)  |
| Grade, n (%)               |             |
| I Well differentiated      | 19 (5.2%)   |
| II Moderate differentiated | 320 (87.9%) |
| III Poorly differentiated  | 25 (6.9%)   |
| Stage, n (%)               |             |
| I                          | 94 (26.1%)  |
| II                         | 106 (29.4%) |
| III                        | 120 (33.3%) |
| IV                         | 40 (11.1%)  |

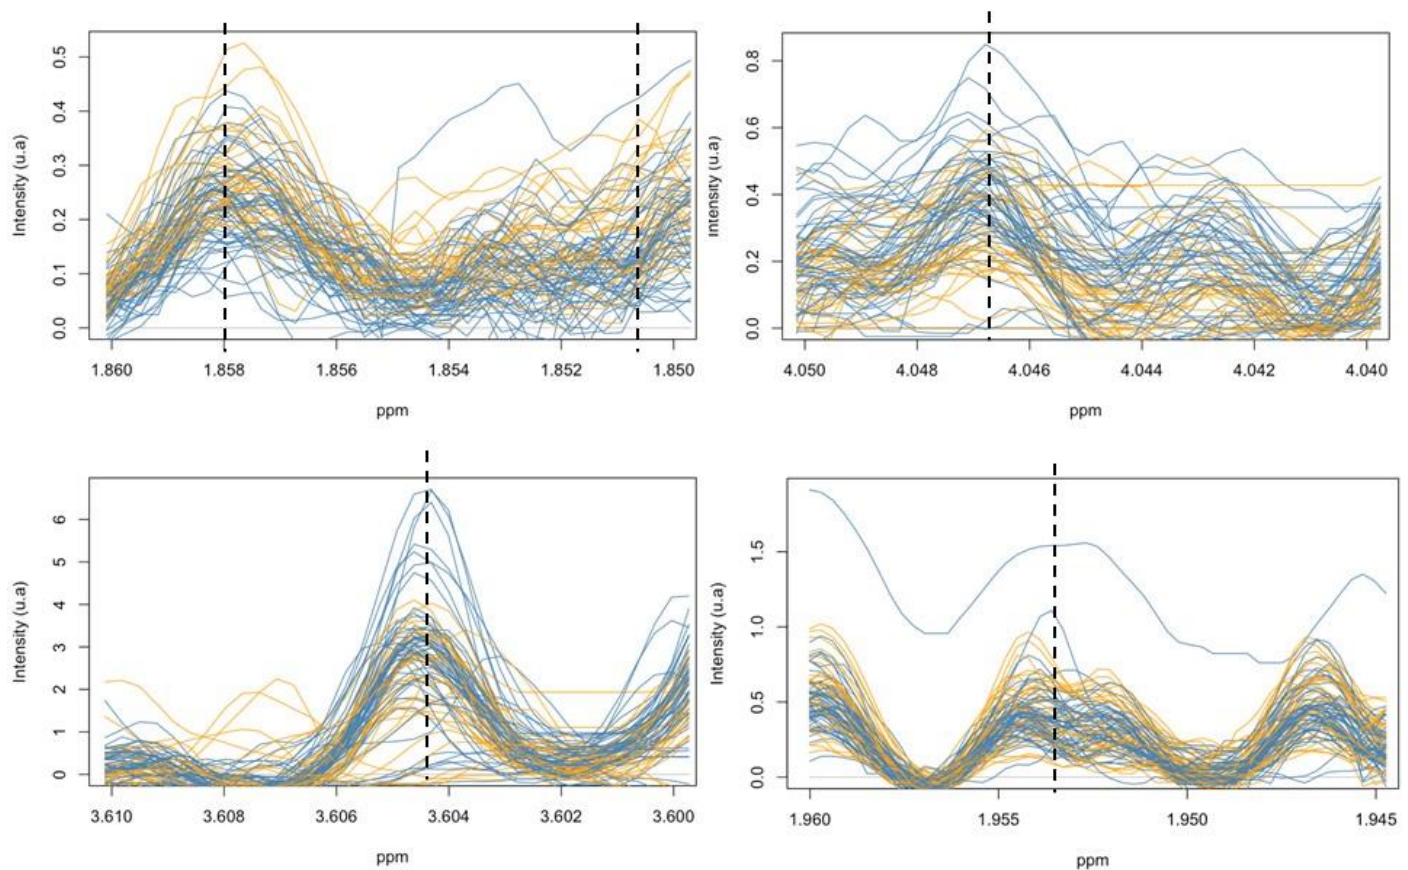

**Figure S1.** Spectral regions of the top 5 contributors of the PLS-DA loading plot. Dashed lines denote the center of the binned signal. Note the differences in absolute intensity.

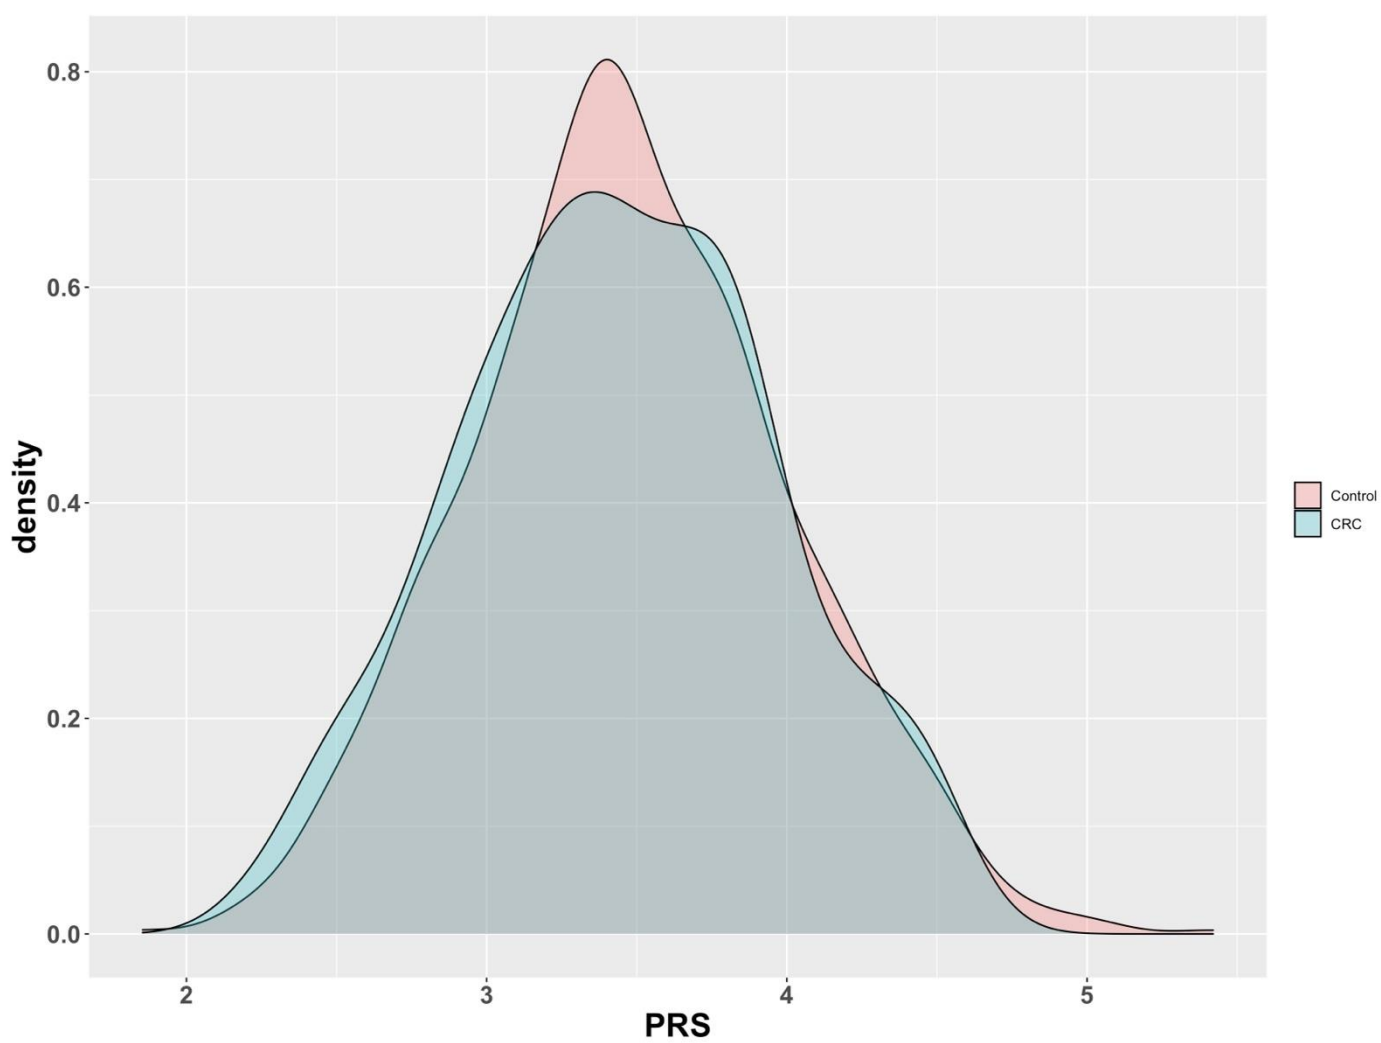

**Figure S2.** PRS of patients with CRC and controls based on the East Asian population.
